# Supplementary material
Source: MDPI journal article supplement (https://www.mdpi.com/2076-3417/13/2/1129)
Supplement: s1 [file s1 › Supplementary Material S1.pdf]

Article

# Spatiotemporal Patterns of Risk Propagation in Complex Financial Networks

Tingting Chen <sup>1,\*</sup>, Yan Li <sup>2,\*</sup>, Xiongfei Jiang <sup>3</sup> and Lingjie Shao <sup>4</sup>

<sup>1</sup> Department of Finance, Zhejiang University of Finance and Economics, Hangzhou 310018, China

<sup>2</sup> Department of Finance, Zhejiang Gongshang University, Hangzhou 310018, China

<sup>3</sup> College of Finance and Information, Ningbo University of Finance and Economics, Ningbo 315175, China

<sup>4</sup> Department of Finance, Zhejiang University of Finance and Economics, Hangzhou 310018, China

\* Correspondence: ttchen@zufe.edu.cn (T.C.); liyan@zjgsu.edu.cn (Y.L.)

We link  $F_{ij}$  with the product of  $i$  and  $j$ 's weighted degree, i.e.,  $S_i S_j$ . As shown by mark triangle in Figure S1,  $F_{ij}$  first positively then negatively scales with  $S_i S_j$  in most cases, i.e., the link first exhibit link-driven effect then anti-link-driven effect. The results of Chinese and American markets are similar. As indicated in Figure S1(a) and (b), the nodes tend to be more degree-driven when the recovery rate  $R$  decreases, while the links tend to be more anti-link-driven after the turning point when the recovery rate  $R$  increases. The smaller  $R$  is, the later the turning point appears. Figure S1(c) and (d) demonstrate that the nodes tend to be more degree-driven as the recovery rate  $B$  increases, and there is no substantive difference for the links with different  $B$ .

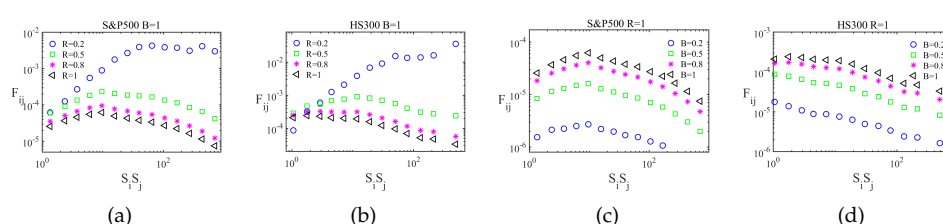

**Figure S1.** Spatiotemporal patterns of risk propagation with different dynamic parameters. We measure the risk propagation flow  $F_i$  and  $F_{ij}$  through all nodes/links with different dynamic parameters for S&P500 market and HS300 market. (a)  $F_{ij}$  vs. the product  $S_i S_j$  for S&P500 market with different infection rates  $R$ . (b)  $F_{ij}$  vs.  $S_i S_j$  for HS300 market with different infection rates  $R$ . (c)  $F_{ij}$  vs.  $S_i S_j$  for S&P500 market with different recovery rates  $B$ . (d)  $F_{ij}$  vs.  $S_i S_j$  for HS300 market with different recovery rates  $B$ .

We measure the risk propagation flow  $F_{ij}$  through all nodes/links for S&P500 market and HS300 market in extreme market states. As displayed in Figure S2,  $F_{ij}$  first positively then negatively scales with  $S_i S_j$ , i.e., the link first exhibit link-driven effect then anti-link-driven effect. As the threshold  $\sigma$  increases, the link-driven effect becomes greater, while the anti-link-driven effect gets weaker. Further, we distinguish from crashes and bubbles, then calculate risk propagation flow with the threshold PMFG graph  $A_{ij}^{\sigma, N}$  and  $A_{ij}^{\sigma, P}$ . As indicated in Figure S2 (c) and (d), when  $A_{ij}$  is smaller than the turning point, the link-driven effect increases in the order of two-tails, negative tail and positive tail; when  $A_{ij}$  is larger than the turning, the anti-link-driven effect decreases from two-tails, negative tail to positive tail.

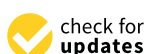

**Citation:** Chen, T.; Li, Y.; Jiang, X.; Shao, L. Spatiotemporal Patterns of Risk Propagation in Complex Financial Networks. *Appl. Sci.* **2023**, *13*, 1129. <https://doi.org/10.3390/app13021129>

Received: 13 December 2022

Revised: 10 January 2023

Accepted: 11 January 2023

Published: 14 January 2023

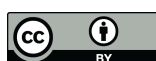

**Copyright:** © 2023 by the authors. Licensee MDPI, Basel, Switzerland. This article is an open access article distributed under the terms and conditions of the Creative Commons Attribution (CC BY) license (<https://creativecommons.org/licenses/by/4.0/>).

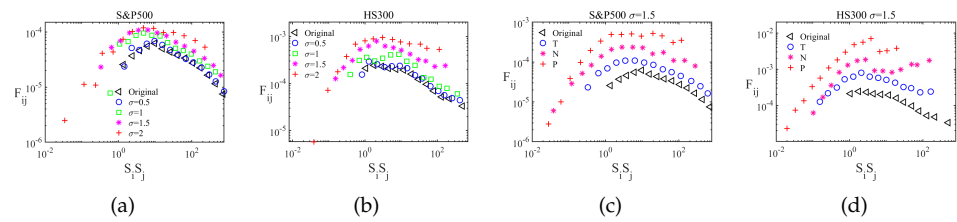

**Figure S2.** Spatiotemporal patterns of risk propagation in extreme market states. We measure the risk propagation flow  $F_i/F_{ij}$  through all nodes/links for S&P500 market and HS300 market in extreme market states. For comparison, the results of original network are displayed in mark triangle. (a)  $F_{ij}$  vs. the product  $S_i S_j$  for S&P500 market with different threshold  $\sigma$  for two tails T. (b)  $F_{ij}$  vs.  $S_i S_j$  for HS300 market with different threshold  $\sigma$  for two tails T. (c)  $F_{ij}$  vs.  $S_i S_j$  for S&P500 market for two tails T, negative tail N and positive tail P. (d)  $F_{ij}$  vs.  $S_i S_j$  for HS300 market for two tails T, negative tail N and positive tail P. For (a) and (b),  $\sigma \in [0.5, 2]$ , while for (c) and (d),  $\sigma = 1.5$ .

The risk propagation flow networks in each community for the two markets are list in Figure S3 and Figure S4.

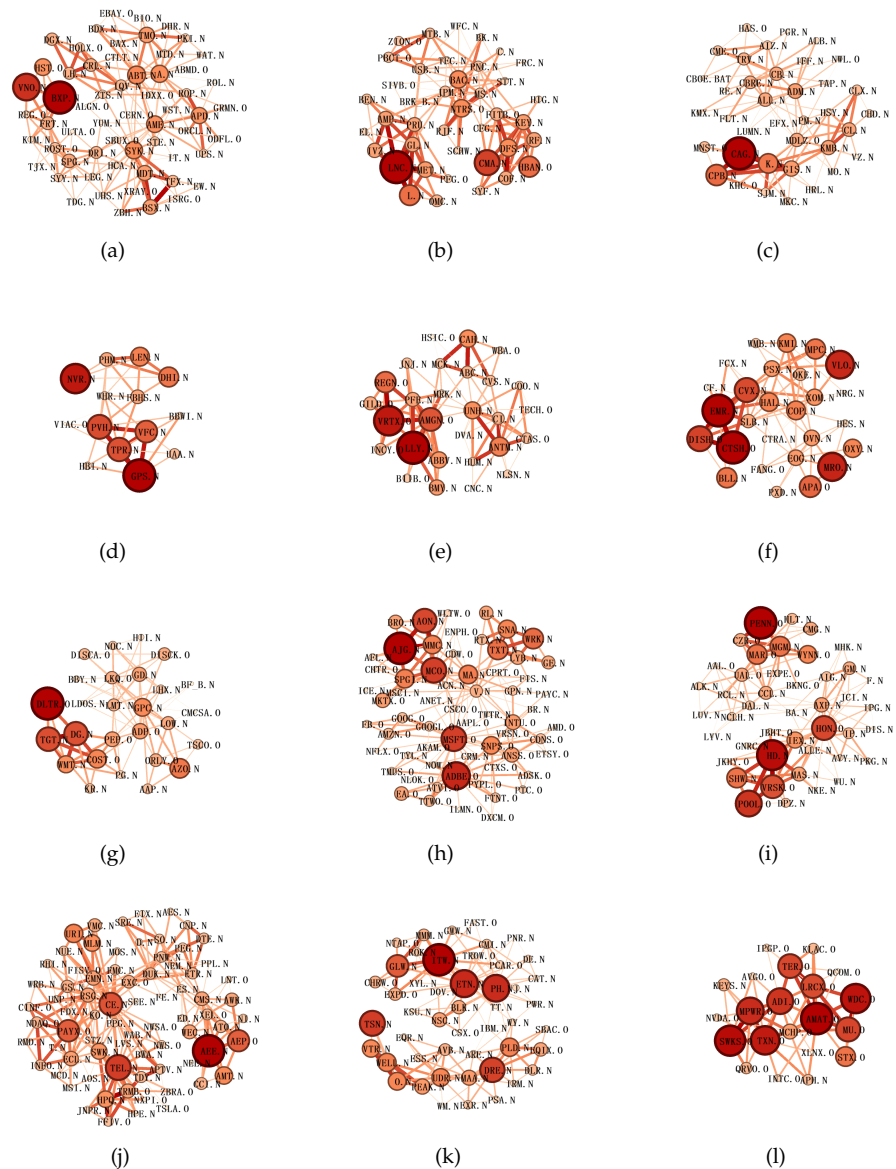

**Figure S3.** Risk propagation flow in each community for S&P500 market. (a) Medical device & service (b) Finance (c) Food & daily necessities (d) Consumer durables & apparel (e) Pharmaceuticals & biotechnology (f) Energy & materials (g) Retailing, capital goods & media (h) Software & service (i) Tourism & transportation (j) Utilities (k) Real estate (l) Semiconductors

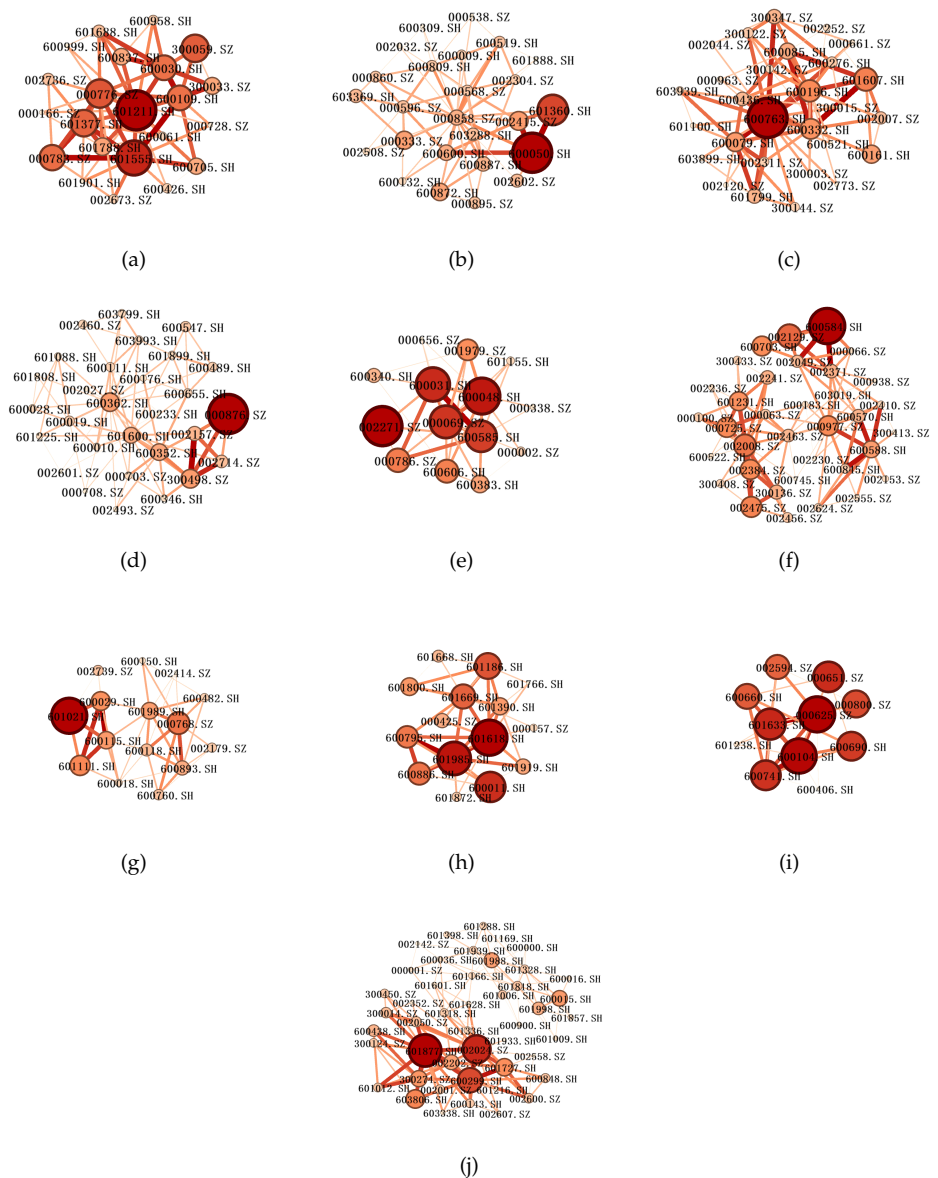

**Figure S4.** Risk propagation flow in each community for HS300 market. (a) Securities (b) Food & daily necessities (c) Healthcare (d) Energy & materials (e) Real estate (f) Information technology (g) Transportation (h) Capital goods & utilities (i) Automobiles (j) Banks, insurance & industrials
