# Supplementary material
Source: MDPI journal article supplement (https://www.mdpi.com/2076-3417/13/2/1129)
Supplement: s1 [file s1 › Supplementary Material S2.xlsx]

## Sheet: SP500 Components
Label	Id2	modularity_class		Community Name	Tick	Company Name
安捷伦科技(AGILENT)	1	0		Medical Device & Service	A.N	Agilent Technologies Inc.
阿比奥梅德(ABIOMED)	7	0			ABMD.O	Abiomed Inc.
雅培(ABBOTT)	8	0			ABT.N	Abbott Laboratories
阿莱技术(ALIGN TECHNOLOGY)	24	0			ALGN.O	Align Technology Inc.
阿美特克(AMETEK)	31	0			AME.N	Ametek Inc.
空气化工产品	42	0			APD.N	Air Products & Chemicals Inc. /De/
百特国际(BAXTER INTL)	56	0			BAX.N	Baxter International Inc.
碧迪(BECTON DICKINSON)	59	0			BDX.N	Becton Dickinson & Co.
BIO RAD实验室-A	63	0			BIO.N	Bio Rad Laboratories Inc.
波士顿科学(BOSTON SCIENTIFIC)	73	0			BSX.N	Boston Scientific Corp.
波士顿地产(BOSTON PROPERTIE)	75	0			BXP.N	Boston Properties Inc.
塞纳(CERNER)	90	0			CERN.O	Cerner Corp.
查尔斯河(CHARLES RIVER)	114	0			CRL.N	Charles River Laboratories International Inc.
CATALENT	119	0			CTLT.N	Catalent, Inc.
奎斯特诊疗(QUEST DIAGNOSTICS)	133	0			DGX.N	Quest Diagnostics Inc.
丹纳赫(DANAHER)	135	0			DHR.N	Danaher Corp. /De/
达登饭店(DARDEN)	146	0			DRI.N	Darden Restaurants Inc.
EBAY	154	0			EBAY.O	Ebay Inc.
爱德华兹生命科学(EDWARDS)	172	0			EW.N	Edwards Lifesciences Corp.
FRT信托	194	0			FRT.N	Federal Realty Investment Trust
佳明(GARMIN)	210	0			GRMN.O	Garmin Ltd.
HCA HEALTHCARE	217	0			HCA.N	Hca Healthcare, Inc.
豪洛捷(HOLOGIC)	223	0			HOLX.O	Hologic Inc.
豪斯特酒店及度假村	229	0			HST.O	Host Hotels & Resorts, Inc.
IDEXX实验室	235	0			IDXX.O	Idexx Laboratories Lnc. /De/
IQVIA	246	0			IQV.N	Iqvia Holdings Inc.
直觉外科(INTUITIVE)	249	0			ISRG.O	Intuitive Surgical Inc.
加特纳(GARTNER)	250	0			IT.N	Gartner Inc.
金克地产(KIMCo. . REALTY)	264	0			KIM.N	KimCo. Realty Corp.
礼恩派(LEGGETT & PLATT)	274	0			LEG.N	Leggett & Platt, Incorporated
美国控股实验室	276	0			LH.N	Laboratory Corp. Of America Holdings
美敦力(MEDTRONIC)	301	0			MDT.N	Medtronic Plc
梅特勒-托利多(METTLER-TOLEDO)	324	0			MTD.N	Mettler Toledo International Inc.
统领货运线	349	0			ODFL.O	Old Dominion Freight Line, Inc.
甲骨文(ORACLE)	353	0			ORCL.N	Oracle Corp.
珀金埃尔默(PERKINELMER)	372	0			PKI.N	Perkinelmer Inc.
REGENCY CENTERS	393	0			REG.O	Regency Centers Corp.
ROLLINS	401	0			ROL.N	Rollins Inc.
儒博科技(ROPER TECHNOLOGIES)	402	0			ROP.N	Roper Technologies Inc.
罗斯百货(ROSS)	403	0			ROST.O	Ross Stores Inc.
星巴克(STARBUCKS)	407	0			SBUX.O	Starbucks Corp.
西蒙地产(SIMON PROPERTY)	417	0			SPG.N	Simon Property Group Lnc. /De/
思泰瑞医疗(STERIS)	420	0			STE.N	Steris Plc
史赛克(STRYKER)	427	0			SYK.N	Stryker Corp.
西斯科(SYSCo. )	428	0			SYY.N	Sysco Corp.
TRANSDIGM	431	0			TDG.N	Transdigm Group Inc.
泰利福(TELEFLEX)	437	0			TFX.N	Teleflex Inc.
TJX公司(TJX)	439	0			TJX.N	Tjx Companies Lnc. /De/
赛默飞世尔科技	440	0			TMO.N	Thermo Fisher Scientific Inc.
环球健康服务(UNIVERSAL HEALTH)	459	0			UHS.N	Universal Health Services Inc.
ULTA美妆	460	0			ULTA.O	Ulta Beauty, Inc.
联合包裹服务(UNITED PARCEL)	463	0			UPS.N	United Parcel Service Inc.
沃那多房产信托(VORNADO REALTY)	471	0			VNO.N	Vornado Realty Trust
沃特世(WATERS)	479	0			WAT.N	Waters Corp. /De/
WEST PHARMACEUTICAL SERVICES	492	0			WST.N	West Pharmaceutical Services Inc.
登士柏西诺德(DENTSPLY SIRONA)	499	0			XRAY.O	Dentsply Sirona Inc.
百胜餐饮(YUM BRANDS)	501	0			YUM.N	Yum Brands Inc.
捷迈邦美(ZIMMER BIOMET)	502	0			ZBH.N	Zimmer Biomet Holdings, Inc.
硕腾(ZOETIS)	505	0			ZTS.N	Zoetis Inc.
阿默普莱斯金融(AMERIPRISE)	33	1		Finance	ZION.O	Zions BanCorporation, National Association /Ut/
美国银行(BANK OF AMERICA)	55	1			HBAN.O	Huntington Bancshares Inc./Md
富兰克林资源(FRANKLIN RESOURCES)	60	1			CMA.N	Comerica Lnc. /New/
纽约梅隆银行(BNY MELLON)	64	1			PBCT.O	People's United Financial, Inc.
伯克希尔(BERKSHIRE)-B	71	1			MTB.N	M&T Bank Corp.
花旗集团(CITIGROUP)	76	1			KEY.N	KeyCorp. /New/
公民金融(CITIZENS FINANCIAL)	92	1			CFG.N	Citizens Financial Group Inc./Ri
联信银行(Co. MERICA)	100	1			RF.N	Regions Financial Corp.
第一资本金融(CAPITAL ONE)	108	1			FITB.O	Fifth Third BanCorp.
探索金融服务	131	1			BAC.N	Bank Of America Corp. /De/
雅诗兰黛(ESTEE LAUDER)	159	1			SCHW.N	Schwab Charles Corp.
五三银行(FIFTH THIRD)	188	1			USB.N	Us BanCorp. \De\
第一共和银行	193	1			JPM.N	JPMorgan Chase & Co.
GLOBE LIFE	201	1			WFC.N	Wells Fargo & Company/Mn
亨廷顿银行(HUNTINGTON)	215	1			RJF.N	Raymond James Financial Inc.
哈特福德金融服务(HARTFORD FINANCIAL)	220	1			PNC.N	PNC Financial Services Group, Inc.
景顺集团(INVESCo. )	252	1			TFC.N	Truist Financial Corp.
摩根大通(JPMORGAN CHASE)	259	1			NTRS.O	Northern Trust Corp.
科凯国际(KEYCorp. )	261	1			C.N	Citigroup Inc.
洛斯保险(LOEWS)	272	1			BK.N	Bank Of New York Mellon Corp.
林肯国民(LInc.o. LN NATIONAL)	282	1			PRU.N	Prudential Financial Inc.
大都会人寿(METLIFE)	302	1			L.N	Loews Corp.
摩根士丹利(MORGAN STANLEY)	318	1			LNC.N	Lincoln National Corp.
制造商和贸易商银行(M&T BANK)	322	1			STT.N	State Street Corp.
北美信托(NORTHERN TRUST)	340	1			MET.N	Metlife Inc.
宏盟集团(OMNICo. M)	352	1			MS.N	Morgan Stanley
人民联合金融	359	1			HIG.N	Hartford Financial Services Group, Inc.
信安金融(PRInc.IPAL FINANCIAL)	366	1			SIVB.O	Svb Financial Group
PNC金融服务	375	1			COF.N	Capital One Financial Corp.
保德信金融(PRUDENTIAL)	381	1			SYF.N	Synchrony Financial
地区金融(REGIONS FINANCIAL)	395	1			BEN.N	Franklin Resources Inc.
瑞杰金融(RAYMOND JAMES)	397	1			PFG.O	Principal Financial Group Inc.
嘉信理财(CHARLES SCHWAB)	408	1			IVZ.N	InvesCo. Ltd.
硅谷银行(SVB FINANCIAL)	411	1			OMC.N	Omnicom Group Inc.
道富银行(STATE STREET)	421	1			GL.N	Globe Life Inc.
SYNCHRONY FINANCIAL	426	1			FRC.N	First Republic Bank
TRUIST FINANCIAL	436	1			AMP.N	Ameriprise Financial Inc.
美国合众银行(US BANCorp. )	465	1			BRK_B.N	Berkshire Hathaway Inc.
富国银行(WELLS FARGO)	484	1			DFS.N	DisCover Financial Services
齐昂银行(ZIONS BANCorp. )	504	1			EL.N	Estee Lauder Companies Inc.
阿彻丹尼尔斯米德兰	12	2		Food & Daily Necessities	CME.O	Cme Group Inc.
艾斯兰(ASSURANT)	20	2			CLX.N	Clorox Co. /De/
雅保(ALBEMARLE)	23	2			TRV.N	Travelers Companies, Inc.
好事达保险(ALLSTATE)	26	2			GIS.N	General Mills Inc.
康尼格拉(Co. NAGRA BRANDS)	77	2			HSY.N	Hershey Co.
丘博保险(CHUBB)	81	2			CB.N	Chubb Ltd.
CBOE GLOBAL MARKETS	82	2			CBOE.BAT	Cboe Global Markets, Inc.
世邦魏理仕(CBRE)	83	2			AIZ.N	Assurant Inc.
丘奇&德怀特(CHURCH & DWIGHT)	93	2			CPB.N	Campbell Soup Co.
高露洁(Co. LGATE)	98	2			KMB.N	Kimberly Clark Corp.
高乐氏(CLOROX)	99	2			K.N	Kellogg Co.
芝加哥交易所集团(CME)	102	2			SJM.N	J M Smucker Co.
康宝浓汤(CAMPBELL SOUP)	112	2			RE.N	Everest Re Group Ltd.
艾可菲(EQUIFAX)	157	2			ALL.N	Allstate Corp.
FLEETCo. R科技	189	2			CAG.N	Conagra Brands Inc.
通用磨坊(GENERAL MILLS)	200	2			ALB.N	Albemarle Corp.
孩之宝(HASBRO)	214	2			CL.N	Colgate Palmolive Co.
荷美尔食品(HORMEL FOODS)	227	2			VZ.N	Verizon Communications Inc.
好时(HERSHEY)	230	2			MDLZ.O	Mondelez International, Inc.
国际香料香精	237	2			MO.N	Altria Group, Inc.
家乐氏(KELLOGG)	260	2			TAP.N	Molson Coors Beverage Co.
卡夫亨氏(KRAFT HEINZ)	263	2			KHC.O	Kraft Heinz Co.
金佰利(KIMBERLY CLARK)	266	2			CHD.N	Church & Dwight Co. Lnc. /De/
车美仕(CARMAX)	268	2			MKC.N	Mccormick & Co. Inc.
LUMEN TECHNOLOGIES	286	2			PM.N	Philip Morris International Inc.
亿滋国际(MONDELEZ INTL)	300	2			MNST.O	Monster Beverage Corp.
味好美(MCCo. RMICK)	305	2			LUMN.N	Lumen Technologies, Inc.
怪物饮料(MONSTER BEVERAGE)	310	2			HRL.N	Hormel Foods Corp. /De/
奥驰亚(ALTRIA)	311	2			CBRE.N	Cbre Group, Inc.
纽威(NEWELL BRANDS)	344	2			PGR.N	Progressive Corp. /Oh/
前进保险(THE PROGRESSIVE)	368	2			ADM.N	Archer-Daniels-Midland Co.
菲利普莫里斯国际(PHILIP MORRIS)	374	2			KMX.N	Carmax Inc.
艾弗再保险(EVEREST RE)	392	2			FLT.N	FleetCor Technologies Inc.
斯马克(J M SMUCKER)	412	2			NWL.O	Newell Brands Inc.
莫尔森库尔斯饮料	430	2			IFF.N	International Flavors & Fragrances Inc.
旅行者集团(TRAVELERS)	445	2			HAS.O	Hasbro Inc.
威瑞森电信(VERIZON)	477	2			EFX.N	Equifax Inc.
BATH & BODY WORKS	57	3		Consumer Durables & Apparel	LEN.N	Lennar Corp. /New/
霍顿房屋(D R HORTON)	134	3			PHM.N	Pultegroup Inc./Mi/
FORTUNE BRANDS HOME & SECURITY	181	3			BBWI.N	Bath & Body Works, Inc.
盖普(GAP)	209	3			DHI.N	Horton D R Lnc. /De/
哈尼斯品牌服装(HANESBRANDS)	216	3			NVR.N	Nvr Inc.
莱纳房屋(LENNAR)-A	275	3			GPS.N	Gap Inc.
NVR	343	3			FBHS.N	Fortune Brands Home & Security Inc.
普尔特房屋(PULTE)	370	3			PVH.N	Pvh Corp./De/
PVH	385	3			WHR.N	Whirlpool Corp. /De/
TAPESTRY	442	3			TPR.N	Tapestry, Inc.
安德玛(UNDER ARMOUR)-A	456	3			VIAC.O	ViacomCBS Inc.
威富(VF)	467	3			HBI.N	Hanesbrands Inc.
维亚康姆哥伦比亚广播(VIACo. MCBS)	468	3			UAA.N	Under Armour Inc.
惠而浦(WHIRLPOOL)	485	3			VFC.N	V F Corp.
艾伯维(ABBVIE)	5	4		Pharmaceuticals & Biotechnology	LLY.N	Eli Lilly & Co.
美源伯根(AMERISOURCEBERGEN)	6	4			ABC.N	Amerisourcebergen Corp.
安进(AMGEN)	32	4			AMGN.O	Amgen Inc.
ANTHEM	38	4			MCK.N	Mckesson Corp.
生物基因(BIOGEN)	62	4			REGN.O	Regeneron Pharmaceuticals Inc.
百时美施贵宝(BRISTOL-MYERS SQUIBB)	69	4			CAH.N	Cardinal Health Inc.
卡地纳健康(CARDINAL HEALTH)	78	4			CVS.N	Cvs Health Corp.
信诺保险(CIGNA)	96	4			WBA.O	Walgreens Boots Alliance, Inc.
CENTENE	106	4			VRTX.O	Vertex Pharmaceuticals Lnc. / Ma
库珀医疗(Co. OPER)	109	4			ANTM.N	Anthem, Inc.
信达思(CINTAS)	118	4			UNH.N	Unitedhealth Group Inc.
西维斯健康(CVS HEALTH)	124	4			PFE.N	Pfizer Inc.
达维塔保健(DAVITA)	149	4			ABBV.N	Abbvie Inc.
吉利德科学(GILEAD SCIENCES)	199	4			MRK.N	Merck & Co., Inc.
亨利香恩服务(HENRY SCHEIN)	228	4			DVA.N	Davita Inc.
哈门那(HUMANA)	231	4			JNJ.N	Johnson & Johnson
因塞特医疗(Inc.YTE)	239	4			GILD.O	Gilead Sciences Inc.
强生公司(JOHNSON & JOHNSON)	257	4			TECH.O	Bio-Techne Corp.
礼来(LILLY ELI)	280	4			HUM.N	Humana Inc.
麦克森(MCKESSON)	298	4			INCY.O	Incyte Corp.
默克(MERCK)	315	4			BMY.N	Bristol Myers Squibb Co.
尼尔森(NIELSEN)	334	4			CI.N	Cigna Corp.
辉瑞制药(PFIZER)	365	4			BIIB.O	Biogen Inc.
再生元制药(REGENERON)	394	4			CTAS.O	Cintas Corp.
BIO-TECHNE	433	4			HSIC.O	Henry Schein Inc.
联合健康集团(UNITEDHEALTH)	461	4			COO.N	Cooper Companies Inc.
福泰制药(VERTEX)	474	4			CNC.N	Centene Corp.
沃尔格林联合博姿	480	4			NLSN.N	Nielsen Holdings Plc
APA	41	5		Energy & Materials	FANG.O	Diamondback Energy Inc.
波尔(BALL)	68	5			MRO.N	Marathon Oil Corp.
CF实业(CF INDUSTRIES)	91	5			EOG.N	Eog Resources Inc.
康菲石油(Co. NOCo. PHILLIPS)	110	5			DVN.N	Devon Energy Corp. /De
Co. TERRA ENERGY	120	5			OKE.N	Oneok Lnc. /New/
高知特科技(Co. GNIZANT)	121	5			APA.O	Apa Corporation
雪佛龙(CHEVRON)	125	5			OXY.N	Occidental Petroleum Corp. /De/
DISH NETWORK	139	5			COP.N	Conoco Phillips
戴文能源(DEVON)	150	5			KMI.N	Kinder Morgan, Inc.
艾默生电气(EMERSON ELECTRIC)	161	5			PSX.N	Phillips 66
EOG能源(EOG RESOURCES)	163	5			PXD.N	Pioneer Natural Resources Co.
DIAMONDBACK能源	178	5			HES.N	Hess Corp.
自由港麦克莫兰(FREEPORT MCMORAN)	182	5			XOM.N	Exxon Mobil Corp.
哈利伯顿(HALLIBURTON)	213	5			HAL.N	Halliburton Co.
赫斯(HESS)	219	5			SLB.N	Schlumberger Limited/Nv
金德摩根(KINDER MORGAN)	267	5			WMB.N	Williams Companies Inc.
马拉松原油(MARATHON PETROLEUM)	313	5			CVX.N	Chevron Corp.
马拉松石油(MARATHON OIL)	317	5			VLO.N	Valero Energy Corp. /Tx
NRG能源(NRG ENERGY)	337	5			FCX.N	Freeport-Mcmoran Inc.
欧尼克(ONEOK)	351	5			BLL.N	Ball Corp.
西方石油(OCCIDENTAL)	356	5			MPC.N	Marathon Petroleum Corp.
PHILLIPS 66	383	5			CF.N	Cf Industries Holdings Inc.
先锋自然资源(PIONEER)	387	5			NRG.N	Nrg Energy, Inc.
斯伦贝谢(SCHLUMBERGER)	413	5			EMR.N	Emerson Electric Co.
瓦莱罗能源(VALERO ENERGY)	469	5			CTRA.N	Coterra Energy Inc.
威廉姆斯(WILLIAMS)	488	5			CTSH.O	Cognizant Technology Solutions Corp.
埃克森美孚(EXXON MOBIL)	498	5			DISH.O	Dish Network Corp.
领先汽车配件	3	6		Retailing,Capital Goods & Media	NOC.N	Northrop Grumman Corp. /De/
自动数据处理	13	6			DG.N	Dollar General Corp.
汽车地带(AUTOZONE)	53	6			LMT.N	Lockheed Martin Corp.
百思买(BEST BUY)	58	6			TGT.N	Target Corp.
百富门(BROWN FORMAN)-B	61	6			WMT.N	Walmart Inc.
康卡斯特(Co. MCAST)	101	6			ORLY.O	O Reilly Automotive Inc.
开市客(Co. STCo. )	111	6			AZO.N	Autozone Inc.
达乐(DOLLAR GENERAL)	132	6			AAP.N	Advance Auto Parts Inc.
DISCo. VERY-A	137	6			PG.N	Procter & Gamble Co.
DISCo. VERY-C	138	6			TSCO.O	Tractor Supply Co. /De/
美元树(DOLLAR TREE)	141	6			LHX.N	L3Harris Technologies, Inc.
通用动力(GENERAL DYNAMICS)	197	6			KR.N	Kroger Co.
通用配件(GENUINE PARTS)	207	6			HII.N	Huntington Ingalls Industries, Inc.
亨廷顿英戈尔斯工业	221	6			DISCA.O	DisCovery, Inc.
克罗格(KROGER)	270	6			DISCK.O	DisCovery, Inc.
LEIDOS	273	6			LOW.N	Lowes Companies Inc.
L3HARRIS TECHNOLOGIES	277	6			COST.O	Costco Wholesale Corp. /New
LKQ	279	6			DLTR.O	Dollar Tree Inc.
洛克希德马丁(LOCKHEED MARTIN)	281	6			GPC.N	Genuine Parts Co.
劳氏(LOWE'S)	284	6			GD.N	General Dynamics Corp.
诺斯罗普-格鲁曼(NORTHROP GRUMMAN)	335	6			PEP.O	Pepsico. Inc.
奥莱利汽车(O REILLY AUTOMOTIVE)	354	6			BBY.N	Best Buy Co. Inc.
百事(PEPSICo. )	364	6			LDOS.N	Leidos Holdings, Inc.
宝洁公司(PROCTER & GAMBLE)	367	6			LKQ.O	Lkq Corp.
塔吉特(TARGET)	438	6			CMCSA.O	Comcast Corp.
拖拉机供应(TRACTOR SUPPLY)	446	6			BF_B.N	Brown Forman Corp.
沃尔玛(WALMART)	489	6			ADP.O	Automatic Data Processing Inc.
苹果(APPLE)	4	7		Software & Service	MKTX.O	Marketaxess Holdings Inc.
埃森哲(ACCENTURE)	9	7			ADBE.O	Adobe Inc.
奥多比(ADOBE)	10	7			AMZN.O	Amazon.Com, Inc.
欧特克(AUTODESK)	14	7			NOW.N	Servicenow, Inc.
美国家庭人寿保险(AFLAC)	18	7			MSCI.N	Msci Inc.
亚瑟加拉格尔(ARTHUR J. GALLAGHER)	21	7			AJG.N	Arthur J. Gallagher & Co. .
阿卡迈(AKAMAI)	22	7			SPGI.N	S&P Global Inc.
超威半导体(AMD)	30	7			PYPL.O	Paypal Holdings, Inc.
亚马逊(AMAZON)	35	7			MMC.N	Marsh & Mclennan Companies, Inc.
ARISTA网络	36	7			SNPS.O	Synopsys Inc.
安西斯(ANSYS)	37	7			RL.N	Ralph Lauren Corp.
怡安保险(AON)	39	7			ATVI.O	Activision Blizzard, Inc.
动视暴雪(ACTIVISION BLIZZARD)	47	7			INTU.O	Intuit Inc.
布罗德里奇(BROADRIDGE)	70	7			MCO.N	Moodys Corp. /De/
布朗保险经纪	72	7			VRSN.O	Verisign Inc./Ca
铿腾电子(CADENCE)	87	7			CRM.N	Salesforce.Com, Inc.
CDW	88	7			TXT.N	Textron Inc.
特许通讯(CHARTER Co. MMUNICATIONS)	95	7			BRO.N	Brown & Brown Inc.
科帕特(Co. PART)	113	7			TYL.N	Tyler Technologies Inc.
赛富时(SALESFORCE)	115	7			NFLX.O	Netflix Inc.
思科(CISCo. )	116	7			MSFT.O	Microsoft Corp.
思杰系统(CITRIX)	123	7			AON.N	Aon Plc
德康医疗(DEXCo. M)	152	7			AKAM.O	Akamai Technologies Inc.
艺电(ELECTRONIC ARTS)	153	7			LYB.N	Lyondellbasell Industries Nv
ENPHASE ENERGY	162	7			ETSY.O	Etsy Inc.
ETSY	170	7			ANSS.O	Ansys Inc.
脸书(META PLATFORMS)	180	7			WTW.O	Willis Towers Watson Public Limited Company
富达国民信息服务(FIDELITY)	186	7			CDNS.O	Cadence Design Systems, Inc.
飞塔(FORTINET)	195	7			ADSK.O	Autodesk Inc.
通用电气(GENERAL ELECTRIC)	198	7			TTWO.O	Take Two Interactive Software Inc.
谷歌(ALPHABET)-C	205	7			CTXS.O	Citrix Systems Inc.
谷歌(ALPHABET)-A	206	7			GOOG.O	Alphabet Inc.
环汇(GLOBAL PAYMENTS)	208	7			GOOGL.O	Alphabet Inc.
洲际交易所(INTERCo. NTINENTAL EXCHANGE)	234	7			FB.O	Meta Platforms, Inc.
ILLUMINA	238	7			FTNT.O	Fortinet Inc.
财捷(INTUIT)	242	7			PAYC.N	Paycom Software, Inc.
利安德巴塞尔工业(LYONDELLBASELL INDUSTRIES)	290	7			ANET.N	Arista Networks, Inc.
万事达卡(MASTERCARD)	292	7			FIS.N	Fidelity National Information Services, Inc.
穆迪(MOODY'S)	299	7			MA.N	Mastercard Inc.
MARKETAXESS	306	7			EA.O	Electronic Arts Inc.
威达信(MARSH & MCLENNAN)	308	7			ILMN.O	Illumina Inc.
MSCI明晟	319	7			BR.N	Broadridge Financial Solutions, Inc.
微软(MICROSOFT)	320	7			AMD.O	Advanced Micro Devices Inc.
奈飞(NETFLIX)	330	7			TWTR.N	Twitter Inc.
NORTONLIFELOCK	333	7			PTC.O	Ptc Inc.
SERVICENOW	336	7			ICE.N	Intercontinental Exchange, Inc.
PAYCo. M SOFTWARE	357	7			WRK.N	Westrock Co.
PTC	384	7			GPN.N	Global Payments Inc.
PAYPAL	388	7			DXCM.O	DexCom Inc.
拉夫劳伦(RALPH LAUREN)	398	7			V.N	Visa Inc.
雷神技术(RAYTHEON TECHNOLOGIES)	405	7			TMUS.O	T-Mobile Us Inc.
实耐宝(SNAP-ON)	414	7			CSCO.O	Cisco Systems, Inc.
新思科技(SYNOPSYS)	415	7			GE.N	General Electric Co.
标普全球(S&P GLOBAL)	418	7			CHTR.O	Charter Communications, Inc. /Mo/
T-MOBILE US	441	7			ACN.N	Accenture Plc
TAKE-TWO互动软件	450	7			AFL.N	Aflac Inc.
推特(TWITTER)	451	7			SNA.N	Snap-On Inc.
德事隆(TEXTRON)	453	7			NLOK.O	Nortonlifelock Inc.
泰勒科技(TYLER TECHNOLOG)	454	7			ENPH.O	Enphase Energy Inc.
VISA	466	7			RTX.N	Raytheon Technologies Corp.
威瑞信(VERISIGN)	473	7			CDW.O	CDW Corp.
韦莱韬悦	486	7			AAPL.O	Apple Inc.
WESTROCK	491	7			CPRT.O	Copart Inc.
美国航空(AMERICAN AIRLINES)	2	8		Tourism & Transportation	UAL.O	United Airlines Holdings, Inc.
美国国际集团(AMERICAN INTERNATIONAL)	19	8			CCL.N	Carnival Corp.
阿拉斯加航空(ALASKA AIR)	25	8			NCLH.N	Norwegian Cruise Line Holdings Ltd.
安朗杰(ALLEGION)	27	8			POOL.O	Pool Corp.
艾利丹尼森(AVERY DENNISON)	50	8			DAL.N	Delta Air Lines Lnc. /De/
美国运通(AMERICAN EXPRESS)	52	8			AAL.O	American Airlines Group Inc.
波音(BOEING)	54	8			PENN.O	Penn National Gaming, Inc.
BOOKING	65	8			RCL.N	Royal Caribbean Group
嘉年华邮轮(CARNIVAL)	85	8			CZR.O	Caesars Entertainment, Inc.
墨式烧烤(CHIPOTLE)	103	8			ALK.N	Alaska Air Group Inc.
CAESARS ENTERTAINMENT	126	8			CMG.N	Chipotle Mexican Grill Inc.
达美航空(DELTA)	128	8			DPZ.N	Dominos Pizza Inc.
迪士尼(WALT DISNEY)	136	8			PKG.N	Packaging Corp. Of America
达美乐比萨(DOMINOS PIZZA)	144	8			MAR.O	Marriott International Lnc. /Md/
亿客行(EXPEDIA)	175	8			HD.N	Home Depot Inc.
福特汽车(FORD MOTOR)	177	8			MGM.N	Mgm Resorts International
通用汽车(GENERAL MOTORS)	203	8			WYNN.O	Wynn Resorts Ltd
Generac控股	204	8			VRSK.O	Verisk Analytics, Inc.
家得宝(HOME DEPOT)	218	8			F.N	Ford Motor Co.
希尔顿酒店(HILTON)	222	8			JKHY.O	Henry Jack & Associates Inc.
霍尼韦尔国际(HONEYWELL INTERNATIONAL)	224	8			SHW.N	Sherwin Williams Co.
IDEX	236	8			MAS.N	Masco Corp. /De/
国际纸业(INTERNATIONAL PAPER)	243	8			MHK.N	Mohawk Industries Inc.
埃培智(INTERPUBLIC)	244	8			LUV.N	Southwest Airlines Co.
JB亨特运输服务	254	8			BA.N	Boeing Co.
江森自控(JOHNSON)	255	8			EXPE.O	Expedia Group,Inc.
杰克亨利(JACK HENRY)	256	8			LYV.N	Live Nation Entertainment, Inc.
西南航空(SOUTHWEST AIRLINES)	287	8			GM.N	General Motors Co.
LIVE NATION ENTERTAINMENT	291	8			GNRC.N	Generac Holdings Inc.
万豪国际(MARRIOTT INTL)	294	8			BKNG.O	Booking Holdings Inc.
马斯科(MASCo. )	295	8			IP.N	International Paper Co. /New/
美高梅国际酒店(MGM RESORTS)	303	8			AIG.N	American International Group Inc.
莫霍克工业(MOHAWK INDUSTRIES)	304	8			AVY.N	Avery Dennison Corp.
挪威游轮控股	326	8			JCI.N	Johnson Controls International Plc
耐克(NIKE)	332	8			IPG.N	Interpublic Group Of Co., Inc.
佩恩国民博彩(PENN)	363	8			HLT.N	Hilton Worldwide Holdings Inc.
美国包装	371	8			NKE.N	Nike Inc.
POOL	378	8			JBHT.O	Hunt J B Transport Services Inc.
ROYAL CARIBBEAN	391	8			HON.O	Honeywell International Inc.
宣伟(SHERWIN-WILLIAMS)	410	8			AXP.N	American Express Co.
美联航(UNITED AIRLINES)	457	8			DIS.N	Walt Disney Co. /
VERISK ANALYTICS	472	8			IEX.N	Idex Corp. /De/
西联汇款(WESTERN UNION)	493	8			WU.N	The Western Union Company
永利度假(WYNN RESORTS)	495	8			ALLE.N	Allegion Plc
阿曼瑞恩(AMEREN)	15	9		Utilities	WEC.N	Wec Energy Group, Inc.
美国电力	16	9			ED.N	Co. nsolidated Edison Inc.
爱依斯电力(AES)	17	9			PNW.N	Pinnacle West Capital Corp.
美国电塔(AMERICAN TOWER)	34	9			CMS.N	Cms Energy Corp.
A.O.史密斯	40	9			DTE.N	Dte Energy Co.
安波福(APTIV)	44	9			ES.N	Eversource Energy
ATMOS能源	46	9			XEL.O	Xcel Energy Inc.
美国水业	51	9			AWK.N	American Water Works Co. mpany, Inc.
博格华纳(BORGWARNER)	74	9			ETR.N	Entergy Corp. /De/
冠城国际(CROWN CASTLE)	84	9			AEP.O	American Electric Power Co. Inc.
塞拉尼斯(CELANESE)	89	9			SO.N	Southern Co.
辛辛那提金融(CInc.INNATI)	97	9			MOS.N	Mosaic Co.
CMS能源(CMS ENERGY)	105	9			SEE.N	Sealed Air Corp. /De
中点能源(CENTERPOINT)	107	9			RMD.N	Resmed Inc.
道明尼资源(DOMINION)	127	9			PEG.N	Public Service Enterprise Group Inc.
DTE能源(DTE ENERGY)	147	9			AES.N	Aes Corp.
杜克能源(DUKE ENERGY)	148	9			MCD.N	Mcdonalds Corp.
艺康化工(ECo. LAB)	155	9			AEE.N	Ameren Corp.
爱迪生联合电气(Co. NSOLIDATED EDISON)	156	9			VMC.N	Vulcan Materials Co.
爱迪生国际(EDISON INTL)	158	9			SRE.N	Sempra Energy
伊士曼化工(EASTMAN CHEMICAL)	160	9			D.N	Dominion Energy, Inc.
能源方案(EVERSOURCE ENERGY)	166	9			PAYX.O	Paychex Inc.
安特吉(ENTERGY)	169	9			DUK.N	Duke Energy Corp.
爱克斯龙电力(EXELON)	173	9			URI.N	United Rentals, Inc.
联邦快递(FEDEX)	183	9			ZBRA.O	Zebra Technologies Corp.
第一能源(FIRSTENERGY)	184	9			TDY.N	Teledyne Technologies Inc.
F5 NETWORKS	185	9			NDAQ.O	Nasdaq, Inc.
费哲金融服务(FISERV)	187	9			AMT.N	American Tower Corp. /Ma/
富美实(FMC)	190	9			JNPR.N	Juniper Networks, Inc.
高盛集团(GOLDMAN SACHS)	211	9			CNP.N	CenterPoint Energy Inc.
慧与(HEWLETT PACKARD)	225	9			PPL.N	Ppl Corp.
惠普(HP)	226	9			LVS.N	Las Vegas Sands Corp.
IHS MARKIT	240	9			NI.N	Nisource Inc./De
瞻博网络(JUNIPER NETWORKS)	258	9			ATO.N	Atmos Energy Corp.
可口可乐(Co. CA Co. LA)	269	9			EXC.O	Exelon Corp.
美国联合能源(ALLIANT ENERGY)	283	9			APTV.N	Aptiv Plc
金沙集团(LAS VEGAS SANDS)	288	9			NXPI.O	Nxp SemiConductors N.V.
麦当劳(MCDONALD'S)	296	9			NWSA.O	News Corp.
马丁-玛丽埃塔(MARTIN MARIETTA)	307	9			WAB.N	Westinghouse Air Brake Technologies Corp.
美盛(MOSAIC)	312	9			EIX.N	Edison International
摩托罗拉解决方案(MOTOROLA SOLUTIONS)	321	9			LNT.O	Alliant Energy Corp.
纳斯达克OMX(NASDAQ)	327	9			KO.N	Coca Cola Co.
新纪元能源(NEXTERA ENERGY)	328	9			BWA.N	Borg Warner Inc.
NEWMONT	329	9			CCI.N	Crown Castle International Corp.
尼索思(NISOURCE)	331	9			EMN.N	Eastman Chemical Co.
纽柯钢铁(NUCo. R)	341	9			CE.N	Celanese Corp.
新闻集团(NEWS)-B	345	9			INFO.N	IHS Markit Ltd.
新闻集团(NEWS)-A	346	9			FE.N	Firstenergy Corp.
恩智浦半导体(NXP SEMICo. NDUCTORS)	347	9			CINF.O	CIncinnati Financial Corp.
沛齐(PAYCHEX)	358	9			MLM.N	Martin Marietta Materials Inc.
公共服务企业集团	362	9			AOS.N	Smith A O Corp.
品尼高西方资本(PINNACLE)	377	9			T.N	At&T Inc.
PPG工业	379	9			TRMB.O	Trimble Inc.
PPL	380	9			PPG.N	Ppg Industries Inc.
罗伯特哈夫(ROBERT HALF INTL)	396	9			FFIV.O	F5, Inc.
瑞思迈(RESMED)	399	9			RHI.N	Robert Half International Inc.
共和废品处理(REPUBLIC SERVICES)	404	9			SWK.N	Stanley Black & Decker, Inc.
希悦尔包装(SEALED AIR)	409	9			RSG.N	Republic Services, Inc.
南方电力(SOUTHERN)	416	9			FMC.N	Fmc Corp.
桑普拉能源(SEMPRA ENERGY)	419	9			NEM.N	Newmont Corporation
星座品牌-A(Co. NSTELLATION BRANDS-A)	423	9			TEL.N	Te Connectivity Ltd
史丹利百得	424	9			MSI.N	Motorola Solutions, Inc.
美国电话电报(AT&T)	429	9			NUE.N	NuCor Corp.
TELEDYNE TECHNOLOGIES	432	9			STZ.N	Constellation Brands, Inc.
泰科电子(TE Co. NNECTIVITY)	434	9			WRB.N	Berkley W R Corp.
TRIMBLE	443	9			ECL.N	ECo. lab Inc.
特斯拉(TESLA)	447	9			FDX.N	Fedex Corp.
联合太平洋(UNION PACIFIC)	462	9			GS.N	Goldman Sachs Group Inc.
美国联合租赁(UNITED RENTALS)	464	9			NEE.N	Nextera Energy Inc.
火神材料(VULCAN)	470	9			HPE.N	Hewlett Packard Enterprise Co.
美国西屋制动	478	9			UNP.N	Union Pacific Corp.
WEC能源(WEC ENERGY)	482	9			FISV.O	Fiserv Inc.
BERKLEY W R	490	9			HPQ.N	HP Inc.
埃克西尔能源(XCEL ENERGY)	496	9			NWS.O	News Corp.
斑马技术(ZEBRA)	503	9			TSLA.O	Tesla, Inc.
亚历山大房地产(ALEXANDRIA)	45	10		Real Estate	VTR.N	Ventas Inc.
艾芙隆海湾社区(AVALONBAY)	48	10			CMI.N	Cummins Inc.
贝莱德(BLACKROCK)	67	10			WELL.N	Welltower Inc.
卡特彼勒(CATERPILLAR)	80	10			O.N	Realty Income Corp.
罗宾逊全球物流	94	10			ROK.N	Rockwell Automation Inc.
康明斯(CUMMINS)	104	10			EXR.N	Extra Space Storage Inc.
CSX运输	117	10			PEAK.N	Healthpeak Properties, Inc.
迪尔(DEERE)	130	10			PCAR.O	Paccar Inc.
数字房地产信托	140	10			UDR.N	Udr, Inc.
都福(DOVER)	142	10			PSA.N	Public Storage
杜克房地产(DUKE REALTY)	145	10			CAT.N	Caterpillar Inc.
易昆尼克斯(EQUINIX)	164	10			ETN.N	Eaton Corp. Plc
公平住屋(EQUITY RESIDENTIAL)	165	10			DRE.N	Duke Realty Corp.
埃塞克斯信托(ESSEX PROPERTY)	167	10			EQIX.O	Equinix Inc.
伊顿(EATON)	168	10			MAA.N	Mid America Apartment Communities Inc.
康捷国际物流	174	10			EQR.N	Equity Residential
EXTRA SPACE STORAGE	176	10			PWR.N	Quanta Services Inc.
快扣(FASTENAL)	179	10			DLR.N	Digital Realty Trust, Inc.
康宁(Co. RNING)	202	10			ITW.N	Illinois Tool Works Inc.
固安捷(GRAINGER)	212	10			PNR.N	Pentair Plc
IBM	233	10			ESS.N	Essex Property Trust Inc.
铁山(IRON MOUNTAIN)	248	10			AVB.N	Avalonbay Communities Inc.
伊利诺伊工具	251	10			MMM.N	3M Co.
雅各布工程(JACo. BS)	253	10			ARE.N	Alexandria Real Estate Equities Inc.
堪萨斯南方铁路(KANSAS)	271	10			DOV.N	Dover Corp.
MAA房产信托	293	10			TT.N	Trane Technologies Plc
3M公司(3M)	309	10			SBAC.O	Sba Communications Corp.
诺福克南方(NORFOLK SOUTHERN)	338	10			FAST.O	Fastenal Co.
美国网存(NETAPP)	339	10			J.N	JaCobs Engineering Group Lnc. /De/
REALTY Inc.o. ME	348	10			XYL.N	Xylem Inc.
帕卡(PACCAR)	360	10			TROW.O	Price T Rowe Group Inc.
HEALTHPEAK PROPERTIES	361	10			PLD.N	Prologis, Inc.
派克汉尼汾(PARKER HANNIFIN)	369	10			NTAP.O	Netapp, Inc.
安博(PROLOGIS)	373	10			NSC.N	Norfolk Southern Corp.
滨特尔(PENTAIR)	376	10			EXPD.O	Expeditors International Of Washington Inc.
大众仓储信托(PUBLIC STORAGE)	382	10			CHRW.O	C H Robinson Worldwide Inc.
广达服务(QUANTA SERVICES)	386	10			TSN.N	Tyson Foods Inc.
罗克韦尔自动化(ROCKWELL)	400	10			DE.N	Deere & Co.
SBA通信	406	10			IRM.N	Iron Mountain Inc.
普信金融(T ROWE PRICE)	444	10			GWW.N	W.W. Grainger, Inc.
泰森食品(TYSON)	448	10			PH.N	Parker Hannifin Corp.
特灵科技(TRANE TECHNOLOGIES)	449	10			CSX.O	Csx Corp.
UDR不动产信托(UDR)	458	10			GLW.N	Corning Lnc. /Ny
芬塔(VENTAS)	475	10			WM.N	Waste Management Inc.
WELLTOWER信托	483	10			BLK.N	Blackrock Inc.
美国废物管理(WASTE MANAGEMENT)	487	10			KSU.N	Kansas City Southern
惠好(WEYERHAEUSER)	494	10			WY.N	Weyerhaeuser Co.
赛莱默(XYLEM)	500	10			IBM.N	International Business Machines Corp.
亚德诺(ANALOG)	11	11		Semiconductors	MU.O	Micron Technology Inc.
应用材料(APPLIED MATERIAL)	28	11			XLNX.O	Xilinx Inc.
安费诺(AMPHENOL)	43	11			AMAT.O	Applied Materials Lnc. /De
博通(BROADCo. M)	49	11			MPWR.O	Monolithic Power Systems Inc.
英特尔(INTEL)	241	11			TER.O	Teradyne, Inc.
IPG光电	245	11			MCHP.O	Microchip Technology Inc.
是德科技(KEYSIGHT TECHNOLOGIES)	262	11			IPGP.O	Ipg Photonics Corp.
科天半导体(KLA)	265	11			NVDA.O	Nvidia Corp.
拉姆研究(LAM RESEARCH)	285	11			LRCX.O	Lam Research Corp.
微芯科技(MICROCHIP)	297	11			ADI.O	Analog Devices Inc.
MONOLITHIC POWER SYSTEMS	314	11			WDC.O	Western Digital Corp.
美光科技(MICRON TECHNOLOGY)	325	11			TXN.O	Texas Instruments Inc.
英伟达(NVIDIA)	342	11			SWKS.O	Skyworks Solutions Inc.
高通(QUALCo. MM)	389	11			STX.O	Seagate Technology Plc
QORVO	390	11			QRVO.O	Qorvo, Inc.
希捷科技(SEAGATE)	422	11			AVGO.O	Broadcom Inc.
思佳讯(SKYWORKS)	425	11			KEYS.N	Keysight Technologies, Inc.
泰瑞达(TERADYNE)	435	11			KLAC.O	Kla Corp.
德州仪器(TEXAS INSTRUMENTS)	452	11			QCOM.O	QualComm Inc./De
西部数据(WESTERN DIGITAL)	481	11			INTC.O	Intel Corp.
赛灵思(XILINX)	497	11			APH.N	Amphenol Corp. /De/

## Sheet: HS300 Components
Community Name	Tick	Company Name
Securities	000783.SZ	Changjiang Securities Co., Ltd.
	600837.SH	Haitong Securities Co., Ltd.
	601555.SH	Soochow Securities Co.,Ltd.
	600999.SH	China Merchants Securities Co., Ltd.
	600958.SH	Orient Securities Co., Ltd.
	601211.SH	Guotai Junan Securities Co., Ltd.
	601377.SH	Industrial Securities Co.,Ltd.
	600109.SH	Sinolink Securities Co., Ltd.
	601788.SH	Everbright Securities Co., Ltd.
	601688.SH	Huatai Securities Co.,Ltd.
	600030.SH	CITIC Securities Co., Ltd.
	000776.SZ	Gf Securities Co.,Ltd.
	600061.SH	SDIC Capital Co., Ltd.
	000728.SZ	Guoyuan Securities Co., Ltd.
	002673.SZ	Western Securities Co.,Ltd.
	601901.SH	Founder Securities Co.,Ltd.
	002736.SZ	Guosen Securities Co.,Ltd.
	300059.SZ	East Money Information Co., Ltd.
	000166.SZ	Shenwan Hongyuan Group Co.,Ltd.
	600705.SH	Avic Industry-finance Holdings Co.,ltd.
	300033.SZ	Hithink Royalflush Information Network Co.,Ltd.
	600426.SH	Shandong Hualu-Hengsheng Chemical Co.,Ltd
Food & Daily Necessities	000858.SZ	Wuliangye Yibin Co.,Ltd
	000596.SZ	Anhui Gujing Distillery Co., Ltd.
	600809.SH	Shanxi Xinghuacun Fen Wine Factory Co.,Ltd.
	600519.SH	Kweichow Moutai Co.,Ltd.
	002304.SZ	Jiangsu Yanghe Brewery Joint-Stock Co., Ltd.
	000568.SZ	Luzhou Laojiao Co.,Ltd
	000860.SZ	Beijing Shunxin Agriculture Co.,Ltd.
	000333.SZ	Midea Group Co.,Ltd.
	600872.SH	Jonjee Hi-Tech Industrial and Commercial Holding Co.,Ltd
	600887.SH	Inner Mongolia Yili Industrial Group Co.,Ltd.
	603288.SH	Foshan Haitian Flavouring and Food Co. Ltd.
	600600.SH	Tsingtao Brewery Co., Ltd.
	000895.SZ	Henan Shuanghui Investment & Development Co.,Ltd.
	603369.SH	Jiangsu King's Luck Brewery Joint-Stock Co., Ltd.
	600009.SH	Shanghai International Airport Co.,Ltd.
	002032.SZ	Zhejiang Supor Co., Ltd.
	000538.SZ	Yunnan Baiyao Group Co., Ltd.
	600132.SH	Chongqing Brewery Co.,Ltd.
	002508.SZ	Hangzhou Robam Appliances Co.,Ltd.
	601888.SH	China Tourism Group Duty Free Co., Ltd.
	002415.SZ	Hangzhou Hikvision Digital Technology Co.,Ltd.
	600309.SH	Wanhua Chemical Group Co.,Ltd.
	601360.SH	360 Security Technology Inc.
	002602.SZ	Zhejiang Century Huatong Group Co.,Ltd.
	600050.SH	China United Network Communications Ltd.
Healthcare	600763.SH	Topchoice Medical Co.,Inc.
	300347.SZ	Hangzhou Tigermed Consulting Co., Ltd.
	002007.SZ	Hualan Biological Engineering,Inc.
	600196.SH	Shanghai Fosun Pharmaceutical (Group) Co., Ltd.
	300122.SZ	Chongqing Zhifei Biological Products Co.,Ltd.
	600276.SH	Jiangsu Hengrui Pharmaceuticals Co.,Ltd.
	600436.SH	Zhangzhou Pientzehuang Pharmaceutical Co., Ltd.
	600521.SH	Zhejiang Huahai Pharmaceutical Co.,Ltd.
	601607.SH	Shanghai Pharmaceuticals Holding Co.,Ltd.
	603939.SH	Yifeng Pharmacy Chain Co., Ltd.
	300015.SZ	Aier Eye Hospital Group Co.,Ltd.
	000661.SZ	Changchun High-Tech Industry (Group) Co., Ltd.
	300142.SZ	Walvax Biotechnology Co.,Ltd.
	002773.SZ	Chengdu Kanghong Pharmaceutical Group Co.,Ltd.
	002311.SZ	Guangdong Haid Group Co.,Ltd.
	600085.SH	Beijing Tongrentang Co.,Ltd
	600161.SH	Beijing Tiantan Biological Products Co., Ltd.
	300003.SZ	Lepu Medical Technology (Beijing) Co.,Ltd.
	000963.SZ	Huadong Medicine Co.,Ltd.
	600332.SH	Guangzhou Baiyunshan Pharmaceutical Holdings Co., Ltd.
	601100.SH	Jiangsu Hengli Hydraulic CO.,Ltd.
	600079.SH	Humanwell Healthcare (Group) Co.,Ltd.
	002044.SZ	Meinian Onehealth Healthcare Holdings Co., Ltd.
	603899.SH	Shanghai M&G Stationery Inc.
	002252.SZ	Shanghai RAAS Blood Products Co., Ltd.
	601799.SH	Changzhou Xingyu Automotive Lighting Systems Co., Ltd.
	002120.SZ	Yunda Holding Co., Ltd.
	300144.SZ	Songcheng Performance Development Co.,Ltd
Energy & Materials	600362.SH	Jiangxi Copper Co., Ltd.
	600489.SH	Zhongjin Gold Corp., Ltd.
	600111.SH	China Northern Rare Earth (Group) High-Tech Co.,Ltd
	600547.SH	Shandong Gold Mining Co.,Ltd.
	601899.SH	Zijin Mining Group Co., Ltd.
	603993.SH	China Molybdenum Co.,Ltd.
	601600.SH	Aluminum Corporation of China Ltd.
	603799.SH	Zhejiang Huayou Cobalt Co., Ltd.
	600010.SH	Inner Mongolia Baotou Steel Union Co.,Ltd
	601225.SH	Shaanxi Coal Industry Co., Ltd.
	600019.SH	Baoshan Iron & Steel Co.,Ltd.
	601088.SH	China Shenhua Energy Co., Ltd.
	600655.SH	Shanghai Yuyuan Tourist Mart( Group) Co., Ltd.
	002493.SZ	Rongsheng Petrochemical Co., Ltd.
	600028.SH	China Petroleum & Chemical Corporation
	000703.SZ	Hengyi Petrochemical Co., Ltd
	002157.SZ	Jiangxi Zhengbang Technology Co.,Ltd.
	300498.SZ	Wens Foodstuff Group Co., Ltd.
	002714.SZ	Muyuan Foods Co.,Ltd.
	000708.SZ	Citic Pacific Special Steel Group Co., Ltd.
	002460.SZ	Ganfeng Lithium Co., Ltd.
	000876.SZ	New Hope Liuhe Co.,Ltd.
	002601.SZ	Lb Group Co., Ltd.
	600346.SH	Hengli Petrochemical Co.,Ltd.
	601808.SH	China Oilfield Services Limited
	600176.SH	China Jushi Co.,Ltd
	002027.SZ	Focus Media Information Technology Co., Ltd.
	600233.SH	YTO Express Group Co.,Ltd.
	600352.SH	Zhejiang Longsheng Group Co.,Ltd
Real Estate	600383.SH	Gemdale Corporation
	600048.SH	Poly Developments and Holdings Group Co., Ltd.
	000002.SZ	China Vanke Co.,Ltd.
	001979.SZ	China Merchants Shekou Industrial Zone Holdings Co.,Ltd
	601155.SH	Seazen Holdings Co.,Ltd.
	600606.SH	Greenland Holdings Co., Ltd.
	600340.SH	China Fortune Land Development Co.,Ltd.
	000069.SZ	Shenzhen Overseas Chinese Town Co.,Ltd.
	000656.SZ	Jinke Property Group Co.,Ltd.
	600585.SH	Anhui Conch Cement Co., Ltd.
	000786.SZ	Beijing New Building Materials Public Co., Ltd.
	600031.SH	Sany Heavy Industry Co.,Ltd.
	000338.SZ	Weichai Power Co.,Ltd.
	002271.SZ	Beijing Oriental Yuhong Waterproof Technology Co.,Ltd.
Information Technology	600584.SH	JCET Group Co., Ltd.
	002371.SZ	NAURA Technology Group Co.,Ltd.
	002384.SZ	Suzhou Dongshan Precision Manufacturing Co.,Ltd.
	300136.SZ	Shenzhen Sunway Communication Co.,Ltd.
	603019.SH	Dawning Information Industry Co.,Ltd.
	002049.SZ	Unigroup Guoxin Microelectronics Co., Ltd.
	600703.SH	Sanan Optoelectronics Co.,Ltd.
	002241.SZ	Goertek Inc.
	600845.SH	Shanghai Baosight Software Co.,Ltd.
	600745.SH	Wingtech Technology Co.,Ltd.
	000066.SZ	China Greatwall Technology Group Co., Ltd.
	600588.SH	Yonyou Network Technology Co., Ltd.
	002410.SZ	Glodon Co., Ltd.
	002008.SZ	Han's Laser Technology Industry Group Co.,Ltd.
	002475.SZ	Luxshare Precision Industry Co., Ltd.
	000977.SZ	Inspur Electronic Information Industry Co.,Ltd.
	002463.SZ	Wus Printed Circuit(kunshan) Co.,Ltd.
	601231.SH	Universal Scientific Industrial(Shanghai)Co., Ltd.
	300433.SZ	Lens Technology Co., Ltd.
	000938.SZ	Unisplendour Co., Ltd.
	000063.SZ	ZTE Corporation
	600183.SH	Shengyi Technology Co.,Ltd.
	002129.SZ	Tianjin Zhonghuan Semiconductor Co., Ltd.
	002624.SZ	Perfect World Co., Ltd.
	002456.SZ	OFILM Group Co.,Ltd.
	002230.SZ	Iflytek Co.,Ltd.
	000100.SZ	TCL Technology Group Corporation
	002153.SZ	Beijing Shiji Information Technology Co., Ltd.
	000725.SZ	BOE Technology Group Co.,Ltd.
	002236.SZ	Zhejiang Dahua Technology Co., Ltd.
	002555.SZ	Wuhu Sanqi Interactive Entertainment Network Technology Group Co.,Ltd.
	300413.SZ	Mango Excellent Media Co., Ltd.
	300408.SZ	Chaozhou Three-Circle (Group) Co.,Ltd.
	600570.SH	Hundsun Technologies Inc.
	600522.SH	Jiangsu Zhongtian Technology Co.,Ltd.
Transportation	600893.SH	Aecc Aviation Power Co,Ltd.
	600760.SH	Avic Shenyang Aircraft Co., Ltd.
	600029.SH	China Southern Airlines Co., Ltd.
	000768.SZ	Avic Xi’An Aircraft Industry Group Co. Ltd.
	601111.SH	Air China Ltd.
	600115.SH	China Eastern Airlines Co., Ltd.
	601021.SH	Spring Airlines Co., Ltd.
	600118.SH	China Spacesat Co.,Ltd.
	600482.SH	China Shipbuilding Industry Group Power Co.,ltd.
	600150.SH	China CSSC Holdings Ltd.
	600018.SH	Shanghai International Port (Group) Co., Ltd.
	601989.SH	China Shipbuilding Industry Co., Ltd.
	002414.SZ	Wuhan Guide Infrared Co.,Ltd.
	002179.SZ	AVIC Jonhon Optronic Technology Co.,Ltd.
	002739.SZ	Wanda Film Holding Co.,Ltd.
Capital Goods & Utilities	601390.SH	China Railway Group Ltd.
	601800.SH	China Communications Construction Co., Ltd.
	601669.SH	Power Construction Corporation of China,Ltd.
	601186.SH	China Railway Construction Co., Ltd.
	601618.SH	Metallurgical Corporation of China Ltd.
	601668.SH	China State Construction Engineering Co., Ltd.
	601766.SH	CRRC Co., Ltd.
	600795.SH	GD Power Development Co.,Ltd.
	601985.SH	China National Nuclear Power Co., Ltd.
	601919.SH	COSCO SHIPPING Holdings Co.,Ltd.
	600011.SH	Huaneng Power International,Inc.
	600886.SH	SDIC Power Holdings Co.,Ltd.
	000425.SZ	XCMG Construction Machinery Co., Ltd.
	601872.SH	China Merchants Energy Shipping Co.,Ltd.
	000157.SZ	Zoomlion Heavy Industry Science and Technology Co., Ltd.
Automobiles	000625.SZ	Chongqing Changan Automobile Co., Ltd.
	601633.SH	Great Wall Motor Co., Ltd.
	600104.SH	SAIC Motor Co., Ltd.
	601238.SH	Guangzhou Automobile Group Co., Ltd
	600741.SH	HUAYU Automotive Systems Co., Ltd.
	002594.SZ	BYD Co., Ltd.
	600660.SH	Fuyao Glass Industry Group Co.,Ltd.
	600690.SH	Haier Smart Home Co., Ltd.
	000651.SZ	Gree Electric Appliances,Inc. of Zhuhai
	000800.SZ	FAW Jiefang Group Co., Ltd
	600406.SH	Nari Technology Co., Ltd.
Banks,Insurance & Industrials	601398.SH	Industrial and Commercial Bank of China Ltd.
	601288.SH	Agricultural Bank of China Ltd.
	601818.SH	China Everbright Bank Company Ltd.
	300274.SZ	Sungrow Power Supply Co., Ltd.
	600036.SH	China Merchants Bank Co., Ltd.
	601939.SH	China Construction Bank Corporation
	603806.SH	Hangzhou First Applied Material Co., Ltd.
	601328.SH	Bank of Communications Co.,Ltd.
	600438.SH	Tongwei Co., Ltd.
	601601.SH	China Pacific Insurance (Group) Co., Ltd.
	300014.SZ	Eve Energy Co., Ltd.
	601166.SH	Industrial Bank Co.,Ltd.
	601988.SH	Bank of China Ltd.
	600016.SH	China Minsheng Banking Corp., Ltd.
	601318.SH	Ping An Insurance (Group) Company of China, Ltd.
	601012.SH	Longi Green Energy Technology Co., Ltd.
	300450.SZ	Wuxi Lead Intelligent Equipment Co.,Ltd.
	601998.SH	China Citic Bank Co., Ltd.
	600015.SH	Hua Xia Bank Co.,Limited
	600000.SH	Shanghai Pudong Development Bank Co.,Ltd.
	601628.SH	China Life Insurance Co., Ltd.
	002050.SZ	Zhejiang Sanhua Intelligent Controls Co.,Ltd.
	000001.SZ	Ping An Bank Co., Ltd.
	601336.SH	Bank Of Ningbo Co.,Ltd
	002142.SZ	New China Life Insurance Co., Ltd.
	601169.SH	Bank of Beijing Co., Ltd.
	600900.SH	China Yangtze Power Co., Ltd.
	601857.SH	Petrochina Co., Ltd.
	601009.SH	Bank of Nanjing Co.,Ltd.
	601877.SH	Zhejiang Chint Electrics Co.,Ltd.
	600299.SH	Bluestar Adisseo Company
	601006.SH	Daqin Railway Co., Ltd.
	603338.SH	Zhejiang Dingli Machinery Co.,Ltd.
	601727.SH	Shanghai Electric Group Co., Ltd.
	002607.SZ	Offcn Education Technology Co., Ltd.
	300124.SZ	Shenzhen Inovance Technology Co., Ltd
	002600.SZ	Lingyi Itech (Guangdong) Company
	600848.SH	Shanghai Lingang Holdings Co.,Ltd.
	002558.SZ	Giant Network Group Co.,Ltd.
	600143.SH	Kingfa Sci.&Tech. Co.,Ltd.
	002001.SZ	Zhejiang NHU Co. Ltd.
	002024.SZ	Suning.Com Co.,Ltd.
	002352.SZ	S.F. Holding Co., Ltd.
	601216.SH	Inner Mongolia Junzheng Energy & Chemical Group Co.,Ltd.
	002202.SZ	Xinjiang Goldwind Science&Technology Co.,Ltd
	601933.SH	Yonghui Superstores Co., Ltd.
